# Supplementary material for: First Report of Native Parasitoids of Fall Armyworm Spodoptera frugiperda Smith (Lepidoptera: Noctuidae) in Mozambique
Source: PubMed Central journal article supplement (PMC7564170; doi:10.3390/insects11090615), 2020-09-08
Supplement: insects-11-00615-s001.pdf [file insects-11-00615-s001.pdf]

Table S1. Survival of parasitoid species.

| Parasitoid species                                            | Districts and season of sampling |   |   |              |   |   |                    |   |   |              |    |   |                         |    |   |              |   |   |                     |    |   |              |   |    |
|---------------------------------------------------------------|----------------------------------|---|---|--------------|---|---|--------------------|---|---|--------------|----|---|-------------------------|----|---|--------------|---|---|---------------------|----|---|--------------|---|----|
|                                                               | District of Macate               |   |   |              |   |   | District of Manica |   |   |              |    |   | District of Sussundenga |    |   |              |   |   | District of Vanduzi |    |   |              |   |    |
|                                                               | Dry Season                       |   |   | Rainy Season |   |   | Dry Season         |   |   | Rainy Season |    |   | Dry Season              |    |   | Rainy Season |   |   | Dry Season          |    |   | Rainy Season |   |    |
|                                                               | T                                | A | D | T            | A | D | T                  | A | D | T            | A  | D | T                       | A  | D | T            | A | D | T                   | A  | D | T            | A | D  |
| <i>Coccygidium luteum</i> (Brullé)<br>(Hym.: Braconidae)      | 8                                | - | 8 | 9            | 4 | 5 | 3                  | - | 3 | 19           | 10 | 9 | 10                      | 1  | 9 | 5            | 1 | 4 | 1                   | 1  | - | 19           | 6 | 13 |
| <i>Charops</i> sp. (Hym.:<br>Ichneumonidae)                   | 1                                | 1 | - | -            | - | - | 1                  | 1 | - | -            | -  | - | 1                       | 1  | - | -            | - | - | -                   | -  | - | -            | - | -  |
| <i>Metopius discolor</i> Tosquinet?<br>(Hym.: Ichneumonidae)  | -                                | - | - | -            | - | - | -                  | - | - | -            | -  | - | 1                       | 1  | - | -            | - | - | -                   | -  | - | -            | - | -  |
| Unidentified (Dipt.:<br>Tachinidae)                           | -                                | - | - | -            | - | - | 1                  | 1 | - | -            | -  | - | -                       | -  | - | -            | - | - | -                   | -  | - | -            | - | -  |
| <i>Drino quadrizonula</i><br>(Thomson) (Dipt.:<br>Tachinidae) | 3                                | 3 | - | -            | - | - | -                  | - | - | -            | -  | - | 28                      | 24 | 4 | -            | - | - | 26                  | 23 | 3 | 1            | - | 1  |

T: total number of individuals emerged from FAW larvae; A: number of individuals which reached adult stage; D: number of individuals which died at larval or pupal stage.
